# Supplementary material
Source: Springer Nature journal article supplement (https://www.springermedizin.de/resource/supplementary/12904_2013_213_MOESM5_ESM.pdf/9517780)

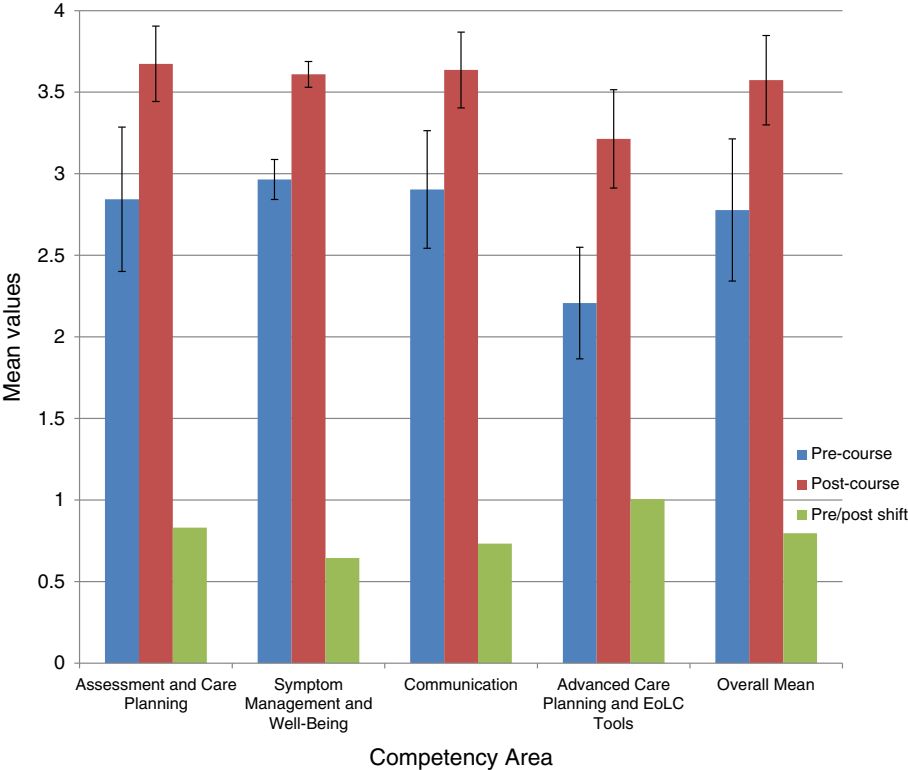

Supplement: MOESM5 [file 9517780]
